# Supplementary material for: Oxygen defect-engineered Zn2P2O7−y as an anode material for lithium-ion batteries
Source: Royal Society of Chemistry journal article supplement (doi:10.1039/d4nj03177f), 2024-01-01
Supplement: d4nj03177f1.pdf [file d4nj03177f1.pdf]

## Oxygen defects-engineered build $\text{Zn}_2\text{P}_2\text{O}_7$ as anode materials for Lithium-ion batteries

Qing-Rong Kong,<sup>a</sup> Ning Zhang,<sup>a</sup> Yanjun Cai<sup>a\*</sup> and Zhi Su<sup>a,b\*</sup>

(<sup>a</sup>College of Chemistry and Chemical Engineering, Xinjiang Key Laboratory of Energy Storage and Photoelectrolytic Materials, Xinjiang Normal University, Urumqi, 830054, Xinjiang, China)

(<sup>b</sup> Xinjiang University, Urumqi 830017, Xinjiang, P.R. China)

\*Corresponding author: Yanjun Cai, Zhi Su

Tel: +86-991-4332683; cyjxjsf@yeah.net, suzhixj@163.com (Z. Su)

### Physical measurements

The XRD patterns were tested using a Bruker D2 X-ray powder diffractometer equipped with a Cu K $\alpha$  radiation source (tube voltage = 30 kV,  $\lambda = 1.5418 \text{ \AA}$ ). High-resolution transmission electron microscopy (HRTEM, ZEISS Libra 200 FE) was used to study the morphology of  $\text{Zn}_2\text{P}_2\text{O}_7$ . The Electron paramagnetic resonance (EPR) was using Bruker A 300 spectrometer, and the operating frequency was about 9.4 GHz. Thermogravimetric analysis (TGA) was measured using an SDT-Q600 thermal analyzer at a heating rate of  $10 \text{ }^\circ\text{C min}^{-1}$  in air. Energy Dispersive Spectrometer (EDS) was using EDAX ELECT PIUS (15 kV, 60 s).

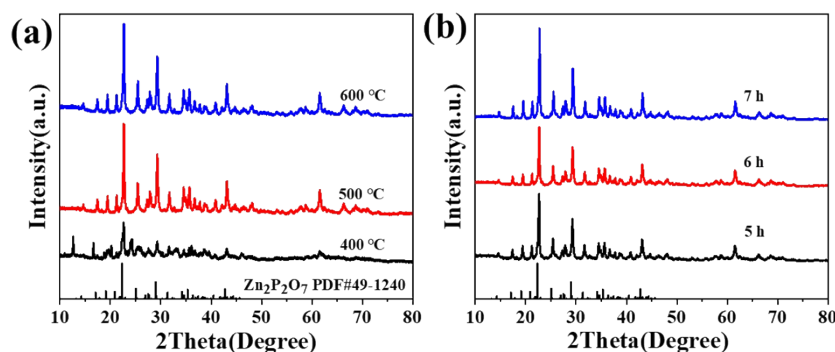

Fig. S1. the XRD patterns of  $\text{Zn}_2\text{P}_2\text{O}_7$  synthesized with different calcined temperature and time.

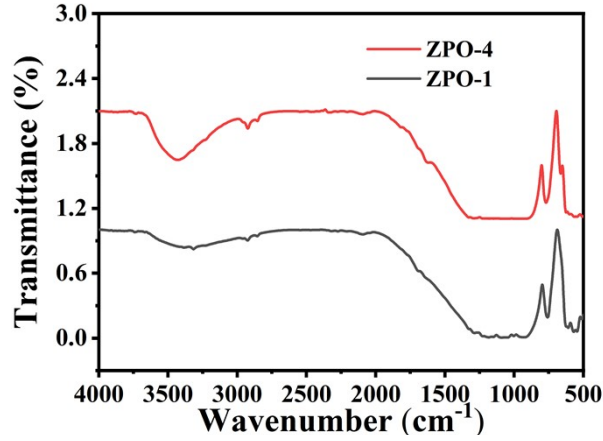

Fig.S2 FTIR spectra of ZPO-1 and ZPO-4.

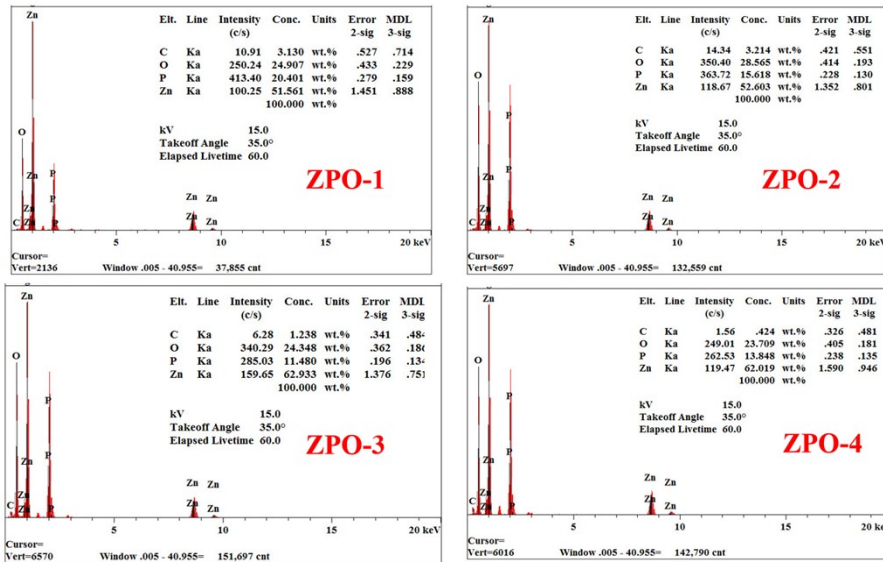

Fig.S3 EDX analysis of ZPO-1, ZPO-2, ZPO-3 and ZPO-4, respectively.

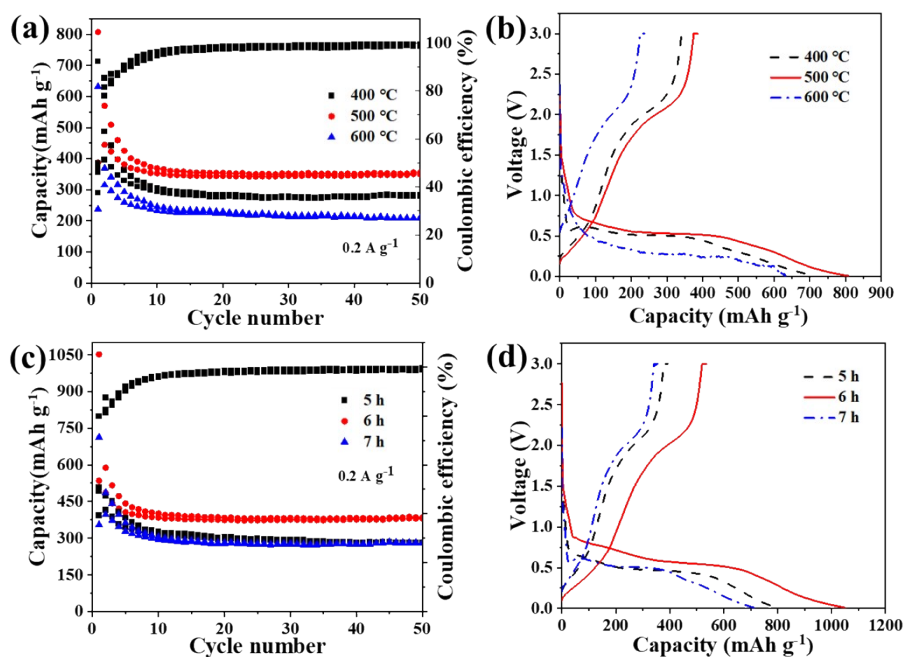

Fig. S4 (a) Cycle performance of  $\text{Zn}_2\text{P}_2\text{O}_{7-y}$  synthesized at different calcination temperatures at 0.2 A g<sup>-1</sup> (b) Initial charge-discharge curves of  $\text{Zn}_2\text{P}_2\text{O}_{7-y}$  synthesized at different calcination temperature. (c) Cycle performance of  $\text{Zn}_2\text{P}_2\text{O}_{7-y}$  synthesized for 500 °C at different calcination times at 0.2 A g<sup>-1</sup> (d) Initial charge-discharge curves of  $\text{Zn}_2\text{P}_2\text{O}_{7-y}$  synthesized for 500 °C at different calcination times.

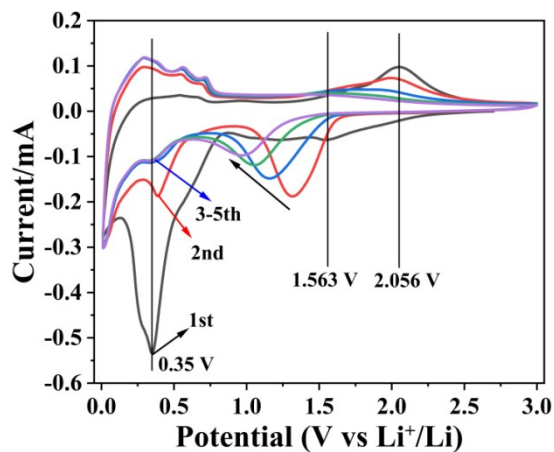

Fig. S5 Cyclic voltammety curves of ZPO-1 for 1-5 cycles.

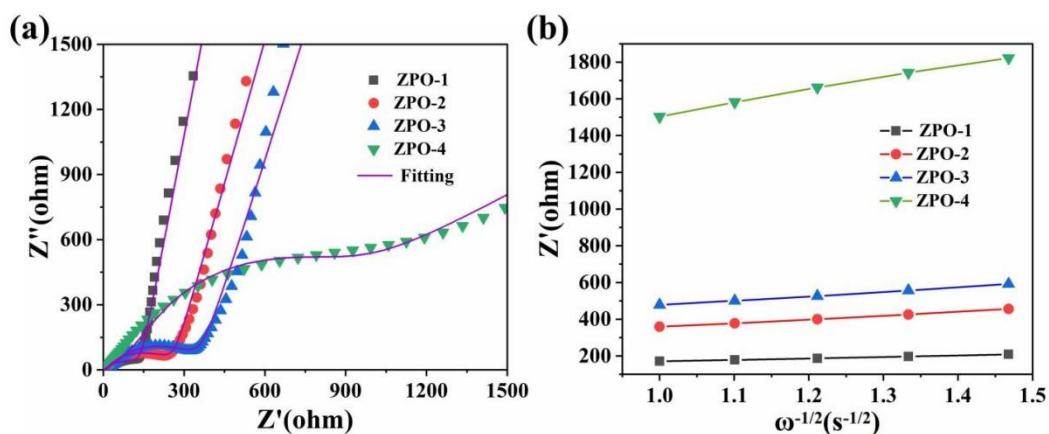

Fig. S6 Samples of ZPO-1, ZPO-2, ZPO-3 and ZPO-4 (a) AC impedance and (b) equivalent circuit fitting curve.

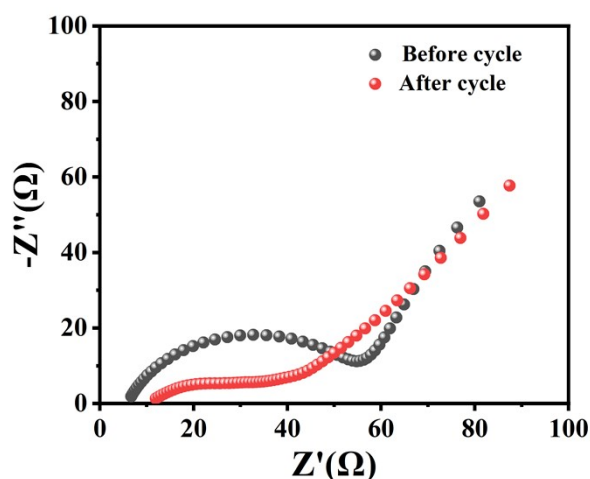

Fig. S7 EIS of the ZPO-1 electrodes before the cycling test and after 500 cycles.

Table S1. The peaks appear in positions corresponding to the vibrations of the groups of ZPO-1.

| Absorption bands      | Attribution                                        |
|-----------------------|----------------------------------------------------|
| 3400 $\text{cm}^{-1}$ | The stretching of O-H of water in air              |
| 1290 $\text{cm}^{-1}$ | The stretching vibrations of $\nu_s(\text{O-P-O})$ |
| 1100 $\text{cm}^{-1}$ | The stretching vibrations of $\nu_s(\text{O-P-O})$ |

|                      |                                                                           |
|----------------------|---------------------------------------------------------------------------|
| 945 cm <sup>-1</sup> | The asymmetric and symmetric stretches of PO <sub>3</sub> terminal groups |
| 763 cm <sup>-1</sup> | The stretching vibration of P-O-P bridges                                 |
| 624 cm <sup>-1</sup> | The fundamental frequency of the [PO <sub>4</sub> ] <sup>3-</sup> group   |
| 576 cm <sup>-1</sup> | The asymmetric P-O-P bridge                                               |

Table S2 The lattice parameter of Zn<sub>2</sub>P<sub>2</sub>O<sub>7-y</sub> by different calcination atmosphere.

| lattice parameter | ZPO-1   | ZPO-2   | ZPO-3   | ZPO-4   |
|-------------------|---------|---------|---------|---------|
| a                 | 4.97    | 4.95    | 4.92    | 4.90    |
| b                 | 13.39   | 13.29   | 13.16   | 13.15   |
| c                 | 16.46   | 16.43   | 16.38   | 16.36   |
| Vol               | 1089.30 | 1070.66 | 1064.90 | 1060.44 |

Note: ZPO-1(Argon-hydrogen mixture), ZPO-2(Argon), ZPO-3(Vacuo), ZPO-4(Air)

Table S3 The atomic ratio of C/O/P/Zn estimated from EDX data of ZPO-1.

| Compound | Element Percentage(C:O:P:Zn) % |
|----------|--------------------------------|
| ZPO-1    | 3.13 : 24.91 : 20.40 : 51.56   |
| ZPO-2    | 3.21 : 28.56 : 15.62 : 52.61   |
| ZPO-3    | 1.24 : 24.35 : 11.48 : 62.29   |
| ZPO-4    | 0.42 : 23.71 : 13.85 : 62.02   |

Table S4 The rare values of Zn<sub>2</sub>P<sub>2</sub>O<sub>7-y</sub> by different calcination atmosphere (mAh g<sup>-1</sup>)

| Current density       | ZPO-1  | ZPO-2 | ZPO-3 | ZPO-4 |
|-----------------------|--------|-------|-------|-------|
| 0.2 A g <sup>-1</sup> | 1178.4 | 749.1 | 901.3 | 911.2 |
| 0.5 A g <sup>-1</sup> | 335.2  | 263.1 | 250.9 | 248.6 |

|                       |       |       |       |       |
|-----------------------|-------|-------|-------|-------|
| 1 A g <sup>-1</sup>   | 261.2 | 200.3 | 193.9 | 185.3 |
| 2 A g <sup>-1</sup>   | 192.3 | 146.6 | 143.9 | 129.4 |
| 5 A g <sup>-1</sup>   | 73.1  | 66.1  | 61.6  | 51.3  |
| 1 A g <sup>-1</sup>   | 251.7 | 177.5 | 159.7 | 150.3 |
| 0.5 A g <sup>-1</sup> | 284.6 | 238.6 | 198.0 | 193.6 |
| 0.2 A g <sup>-1</sup> | 364.1 | 297.5 | 221.5 | 218.6 |
| 1 A g <sup>-1</sup>   | 277.2 | 207.8 | 165.3 | 152.5 |

Table S5 Cycling capacity of Zn<sub>2</sub>P<sub>2</sub>O<sub>7-y</sub> by different calcination atmosphere at 1 A g<sup>-1</sup>.

|                                      | ZPO-1 | ZPO-2 | ZPO-3 | ZPO-4              |
|--------------------------------------|-------|-------|-------|--------------------|
| Initial discharge capacity           | 633.7 | 608.7 | 293.0 | 251.8              |
| Initial charge capacity              | 209.7 | 179.2 | 87.8  | 82.3               |
| Discharge capacity after 1200 cycles | 260.6 | 211.2 | 158.0 | 103.2 (600 cycles) |
| Charge capacity after 1200 cycles    | 260.4 | 211.0 | 157.7 | 103.0 (600 cycles) |
| Capacity retention rate              | 41.1% | 34.7% | 53.9% | 40.9 %             |

Table S6 AC impedance of Zn<sub>2</sub>P<sub>2</sub>O<sub>7-y</sub> by different calcination atmosphere.

| sample | Rs(Ω) | Rct(Ω) | $\bar{\omega}w(\text{cm}^2\text{s}^{-0.5})$ | D <sub>Li<sup>+</sup></sub> (cm <sup>2</sup> s <sup>-1</sup> ) |
|--------|-------|--------|---------------------------------------------|----------------------------------------------------------------|
| ZOP-1  | 2.13  | 157.5  | 65.4                                        | 8.53 × 10 <sup>-14</sup>                                       |
| ZOP-2  | 8.45  | 270.5  | 162.9                                       | 1.26 × 10 <sup>-14</sup>                                       |
| ZOP-3  | 16.7  | 364.5  | 197.6                                       | 9.28 × 10 <sup>-15</sup>                                       |
| ZOP-4  | 10.12 | 1492.0 | 914.5                                       | 1.18 × 10 <sup>-15</sup>                                       |
